# Supplementary material for: One-step template-free electrodeposition of novel poly(indole-7-carboxylic acid) nanowires and their high capacitance properties
Source: Royal Society of Chemistry journal article supplement (doi:10.1039/c4ra11586d), 2014-12-04
Supplement: c4ra11586d1.pdf [file c4ra11586d1.pdf]

Supplementary information for

**One-step template-free electrodeposition of novel poly(indole-7-carboxylic acid)  
nanowires and their high capacitance properties**

Xiumei Ma <sup>1,§</sup>, Weiqiang Zhou <sup>1,§</sup>, Daize Mo <sup>1</sup>, Baoyang Lu <sup>2</sup>, Fengxing Jiang <sup>3</sup>,  
Jingkun Xu <sup>1,\*</sup>

<sup>1</sup>Jiangxi Key Laboratory of Organic Chemistry, Jiangxi Science and Technology  
Normal University, Nanchang 330013

<sup>2</sup>School of Pharmacy, Jiangxi Science and Technology Normal University, Nanchang,  
330013, PR China

<sup>3</sup>Department of Physics, Jiangxi Science and Technology Normal University,  
Nanchang 330013, PR China

\* E-mail: [xujingkun@tsinghua.org.cn](mailto:xujingkun@tsinghua.org.cn).

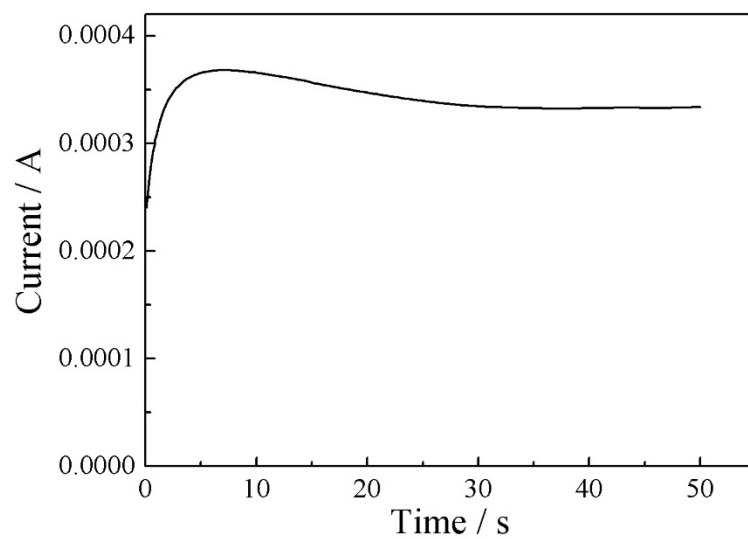

**Figure S1.** The chronoamperometric curve of 50 mM ICA on GC substrates at 1.2 V in ACN solution containing 0.1 M LiClO<sub>4</sub>.

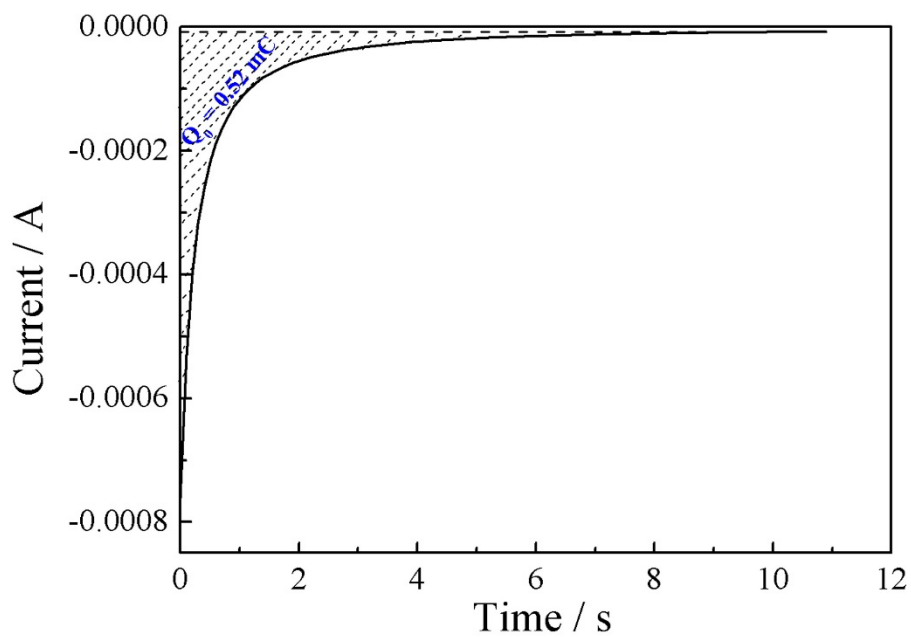

**Figure S2.** The chronoamperometric curve of PICA film ( $Q_d = 5.0 \text{ mC}$ ) at  $-0.1 \text{ V}$ . When the applied potential was  $-0.1 \text{ V}$ , the PICA film was dedoped, and the dedoping process was ended when the current was close to zero. The shadow area shows the integral charges  $Q_o = 0.52 \text{ mC}$ , which is the total charges of oxidized species in the PICA films ( $Q_d = 5.0 \text{ mC}$ ).

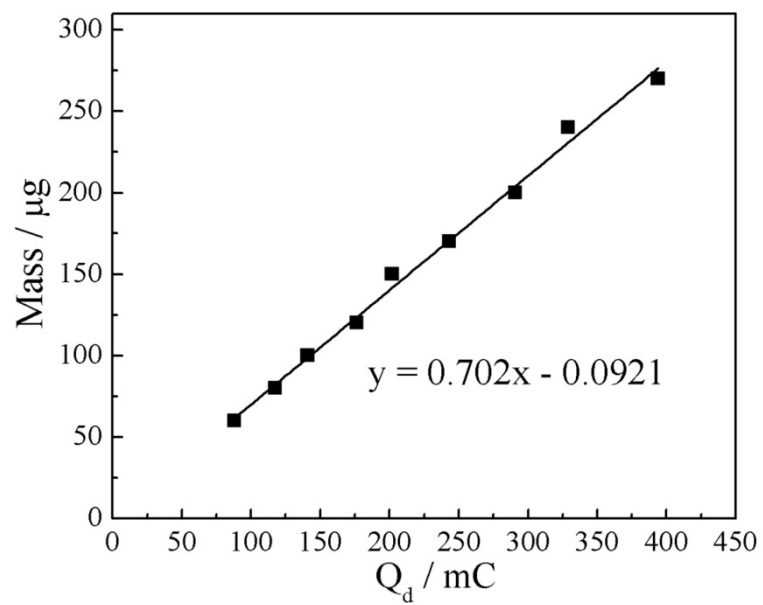

**Figure S3.** Deposition mass vs. deposition charge for PICA nanowires at 1.2 V.

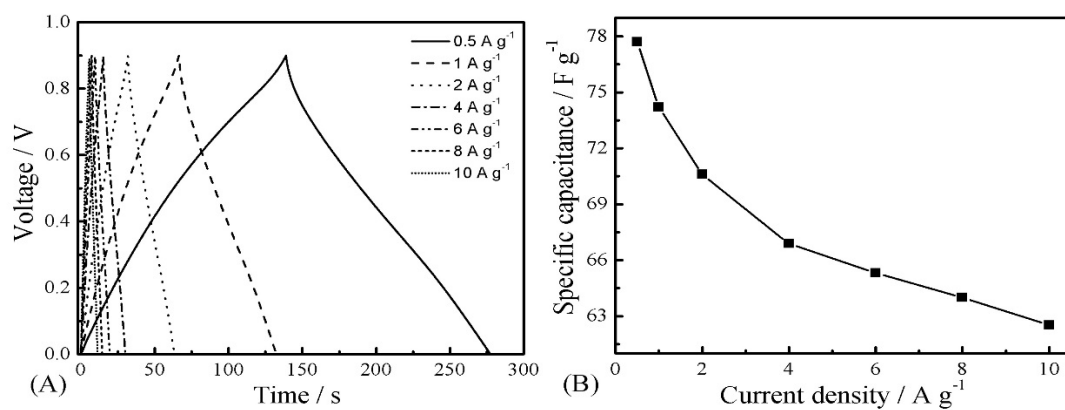

**Figure S4.** (A) Galvanostatic charge/discharge curves of the symmetric full cell based on two PICA electrodes at different current density, (B) Specific capacitance of the symmetric full cell based on two PICA electrodes as a function of current density, Mass loading of each electrode is fixed at 3.7  $\mu\text{g}$ . The specific capacitance in Figure S4. (B) were calculated according to the equation (1):

$$C = \frac{It}{mV} \quad (1)$$

where  $C$  is specific capacitance ( $\text{F g}^{-1}$ ),  $I$  and  $t$  are the discharge current and time, respectively,  $V$  is the voltage range, and  $m$  is the total mass of two PICA electrodes.

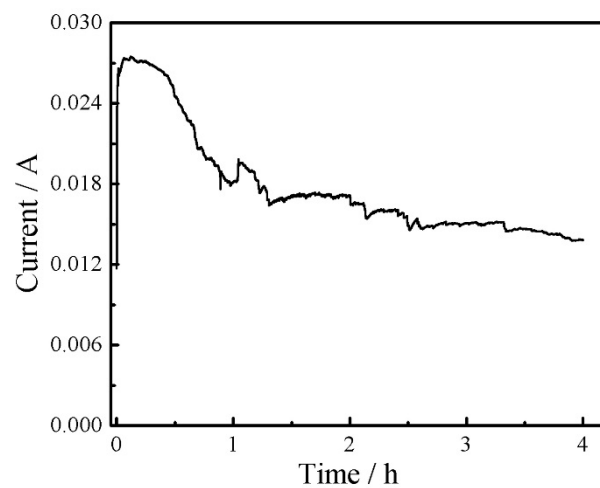

**Figure S5.** Chronoamperometric curve of 50 mM ICA on Pt sheet with a surface area of 5 cm<sup>2</sup> at 1.2 V for 4 h in ACN solution containing 0.1 M LiClO<sub>4</sub>.

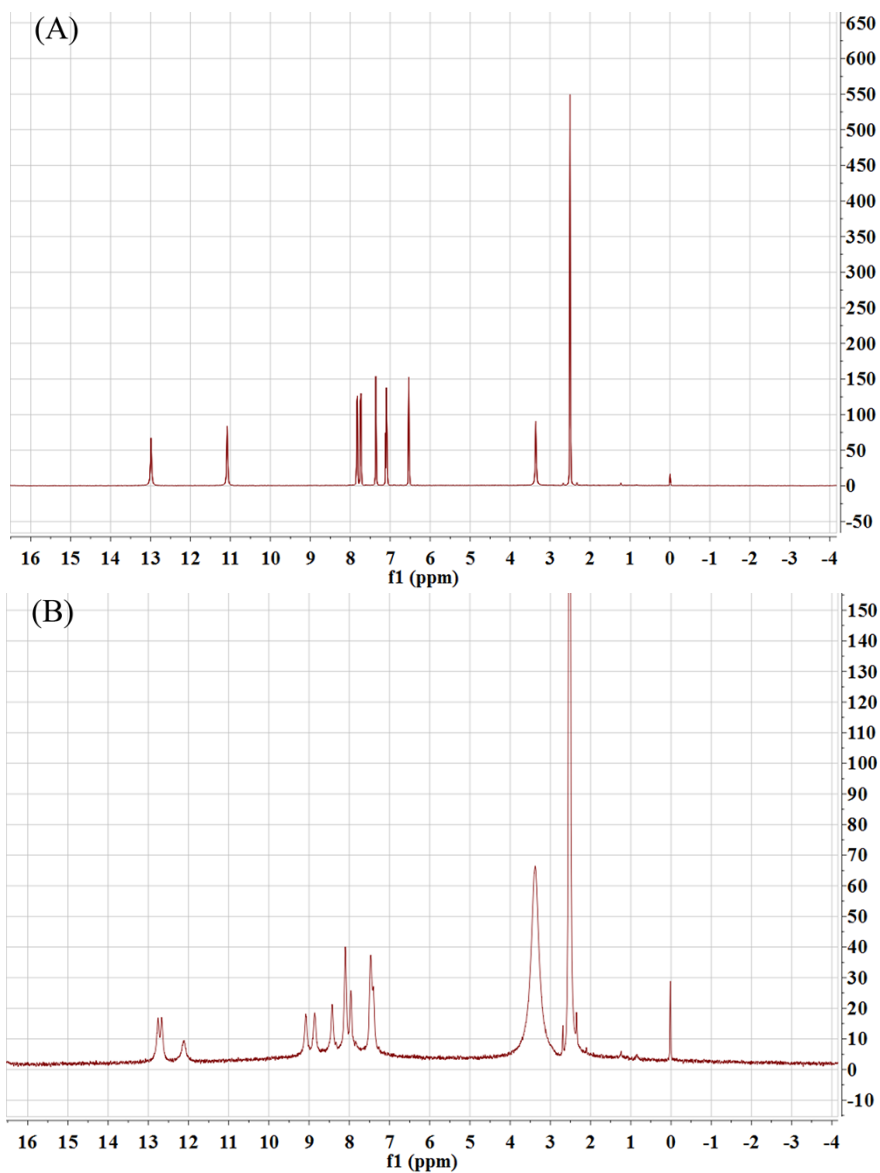

**Figure S6.** The complete  $^1\text{H}$  NMR spectra of ICA (A) and dedoped PICA (B) in  $\text{CD}_3\text{SOCD}_3$ .

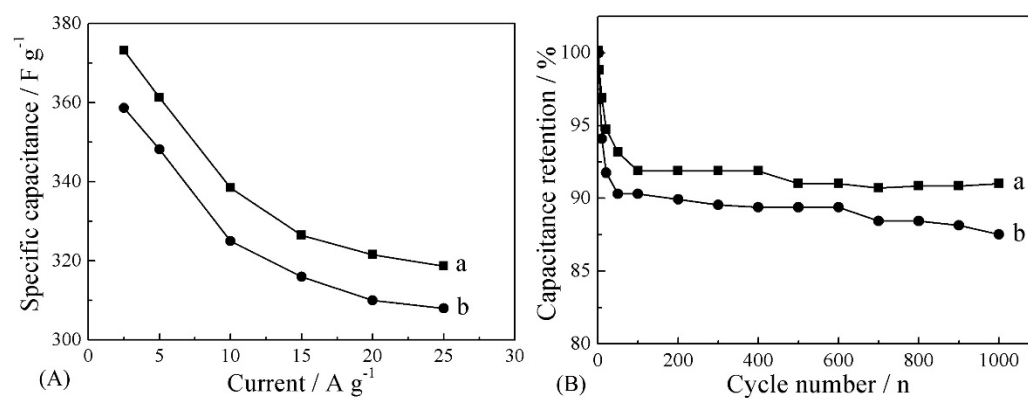

**Figure S7.** (A) Specific capacitance of poly(indole-7-carboxylic acid) (a) and poly(indole-6-carboxylic acid) (b) as a function of current density, respectively, (B) Galvanostatic charge-discharge life of poly(indole-7-carboxylic acid) (a) and poly(indole-6-carboxylic acid) (b) in 1.0 M H<sub>2</sub>SO<sub>4</sub> solution at a constant current density of 15 A g<sup>-1</sup>, the potential range is from 0.10 to 1.0 V. Mass loading: 3.7 μg.
